# Supplementary material for: Antibacterial and Cytocompatible pH-Responsive Peptide Hydrogel
Source: MDPI journal article supplement (doi:10.3390/molecules28114390), 2023-05-27
Supplement: s1 [file s1]

**Table S1.** pH-sensitive peptide-based hydrogels designed previously.

| peptide                                     | G' (pH),<br>wt%                 | Self-<br>heal<br>ing | Antimicrobi<br>al properties | Potential<br>application        | cytocompati<br>bility | Reference     |
|---------------------------------------------|---------------------------------|----------------------|------------------------------|---------------------------------|-----------------------|---------------|
| CKIKIKIK-IPPT-<br>KIOIKIKC- NH <sub>2</sub> | 1500 Pa (7.4),<br>1.5 wt%       | Yes                  | –                            | Anti-tumor drug<br>delivery     | Yes                   | <sup>1</sup>  |
| EKAIQIAF                                    | 1500 Pa (7.4),<br>2 wt %        | –                    | –                            | Anti-tumor drug<br>delivery     | Yes                   | <sup>2</sup>  |
| SSSGGK*GGHHH<br>Where * = palmitoyl<br>tail | 3500 Pa (9.0),<br>0.2 wt%       | –                    | –                            | 3D tissue<br>scaffold           | Yes                   | <sup>3</sup>  |
| Lauryl-FFAGHH                               | –                               | –                    | –                            | –                               | –                     | <sup>4</sup>  |
| FEFEFRFK                                    | 700 Pa (7.4),<br>2 wt%          | –                    | –                            | Anti-tumor drug<br>delivery     | Yes                   | <sup>5</sup>  |
| Nap-FEFK                                    | 10000 Pa (7),<br>2.6 wt%        | Yes                  | –                            | Cell-supporting<br>scaffold     | Yes                   | <sup>6</sup>  |
| VKVKVOVK-V <sup>D</sup> PPT-<br>KVEVKVKV    | 4000 Pa (7.4),<br>1.5 wt%       | Yes                  | –                            | Anti-tumor drug<br>delivery     | Yes                   | <sup>7</sup>  |
| Palmitoyl- VVAEEE                           | –                               | –                    | –                            | Anti-tumor<br>activity          | Yes                   | <sup>8</sup>  |
| VKVKVKVK-V <sup>D</sup> PPT-<br>KVVKVKVKV   | 1200 Pa (9),<br>2 wt%           | –                    | –                            | –                               | –                     | <sup>9</sup>  |
| LKELAKV LHELAKL<br>VKEALHA                  | 350 Pa,<br>0.35 wt%             | –                    | –                            | Tissue<br>engineering           | Yes                   | <sup>10</sup> |
| (KIGAKI)3-TDPPG-<br>(KIGAKI)3               | 13-20 Pa at<br>20°C, 0.5<br>wt% | –                    | Yes                          | Tissue<br>engineering           | –                     | <sup>11</sup> |
| FHHFRFRFHHF                                 | ~50,000 Pa<br>(8), 1 wt%        | Yes                  | Yes                          | Wound healing,<br>drug delivery | Yes                   | This<br>work  |

– Not shown

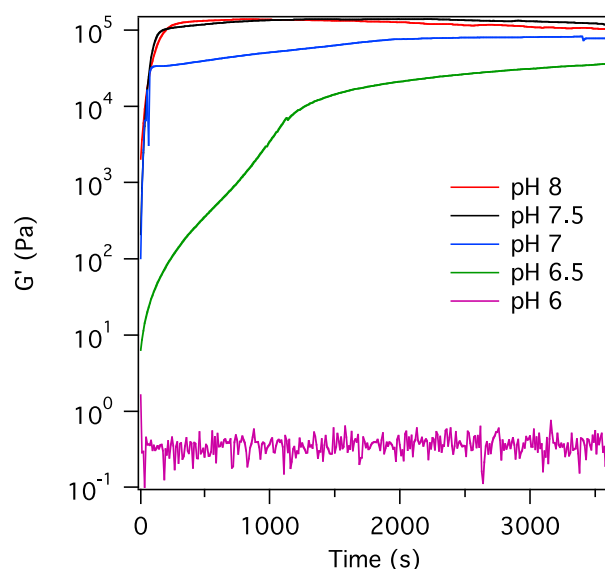

**Figure S1.** Rheology runs on FHFF-K peptide showing traces at different pH values. The hydrogel samples were assembled to make a final 1 wt% peptide in buffer 50 mM Hepes and 50 mM MOPS (pH 6.0/6.5/7.0/7.5/8.0) and running at 37°C for 1 hr.

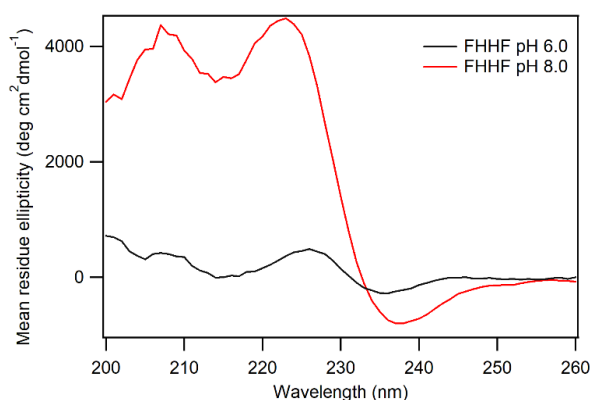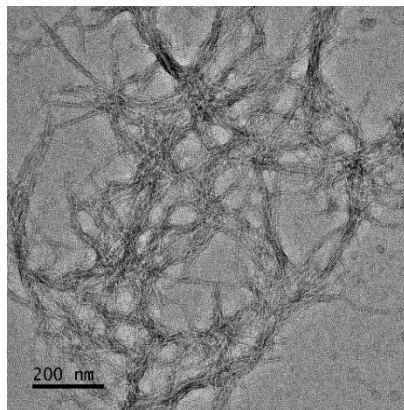

**Figure S2.** Peptide FHFF-11 assembles into fibrils at pH 8 as can be seen by CD (left) and TEM (right). Left figure shows CD spectra of FHFF-11 peptide in buffer mixture at pH 6 and 8. The positive signal at 210-230 nm is due to exciton coupling of Phe residues.<sup>12-15</sup> Samples were prepared by incubating FHFF-11 peptide (3 mM, 0.25 wt%) in buffer (12.5 mM HEPES 12.5 mM MOPS, pH 6 and 8) overnight at 37°C. CD spectra were collected with the pathlength of 0.1 mm and 10 scans for each sample.

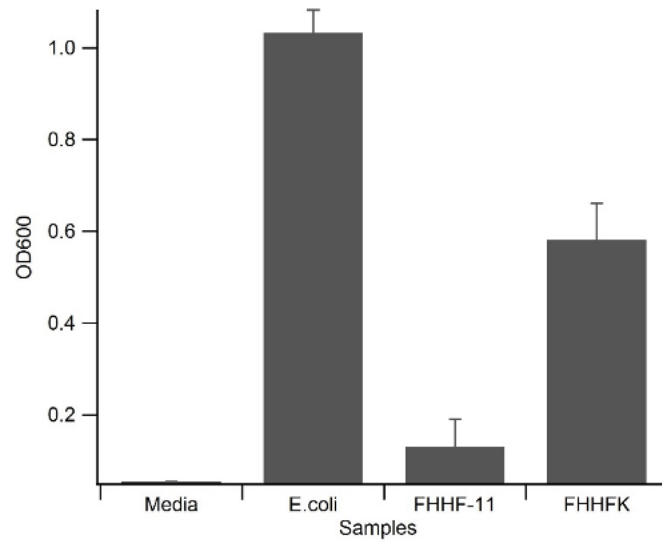

**Figure S3.** Inhibition of bacterial growth. Hydrogel samples were formed from 1 wt%. All samples except the first one (media) contained *E. coli* culture.

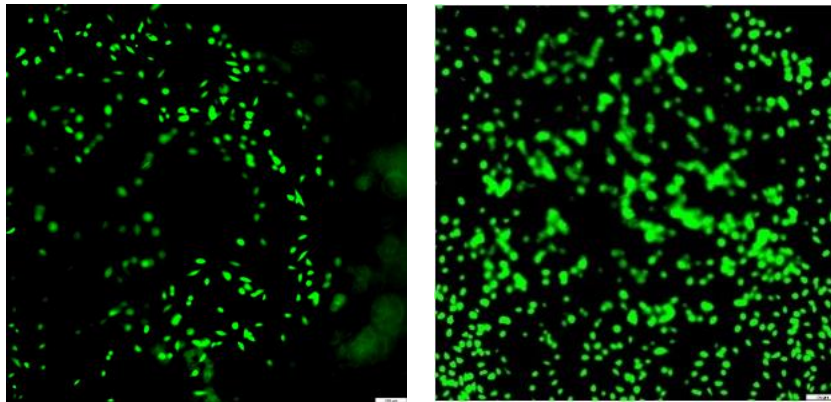

**Figure S4.** Live/dead assay for the fibroblast cells: fibroblasts on the surface of FHHF-11 hydrogel (left) and its GRGD derivative (right) showing live cells.

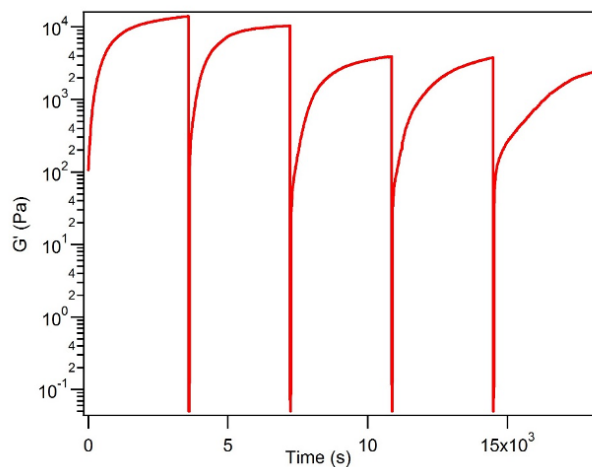

**Figure S5.** Shear recovery of the FHHF11 hydrogel prepared by mixing 1 wt% peptide FHHF-11 in buffer (50 mM HEPES/50 mM MOPS, pH 7). In each cycle the hydrogel was subjected to 1000% strain at 6.283 rad/s for 30 s at 37°C, followed by an oscillation time sweep experiment (0.2% strain) for 1 hr to check the sample's recovery after shear.

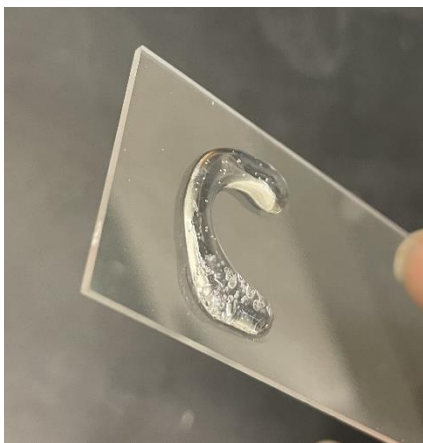

**Figure S6.** Recovery of hydrogel material after syringe delivery. 1wt% of peptide hydrogel was assembled inside a syringe (900  $\mu$ l). Hydrogel was assembled by mixing 450  $\mu$ L of peptide solution in water (2 wt%) with 450  $\mu$ L of buffer (100 mM Hepes, pH 8) inside a syringe. The mixture was incubated for 15 min at 37°C and then the drawing was made on a glass slide, which was subsequently incubated at 37°C for another 15 min (a beaker with water was placed inside incubator).

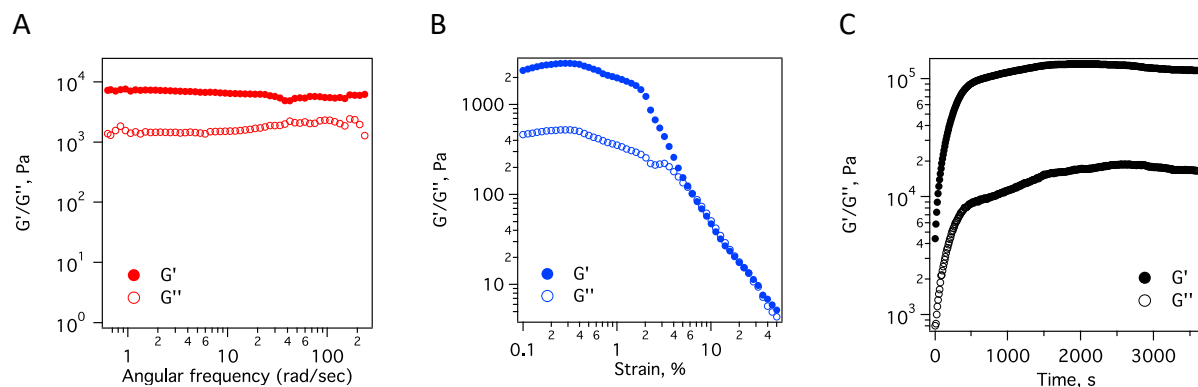

**Figure S7.** (A) Frequency and (B) strain sweep rheological data collected at 0.2% strain and 6.28 rad/s frequency (1 Hz) on the pre-formed gels. Closed and open symbols represent storage ( $G'$ ) and loss ( $G''$ ) modulus. (C) The hydrogel samples were assembled by mixing 2 wt% peptide stock in water and buffer (100 mM Hepes, pH 8) and incubating at 37°C for 1 hr.

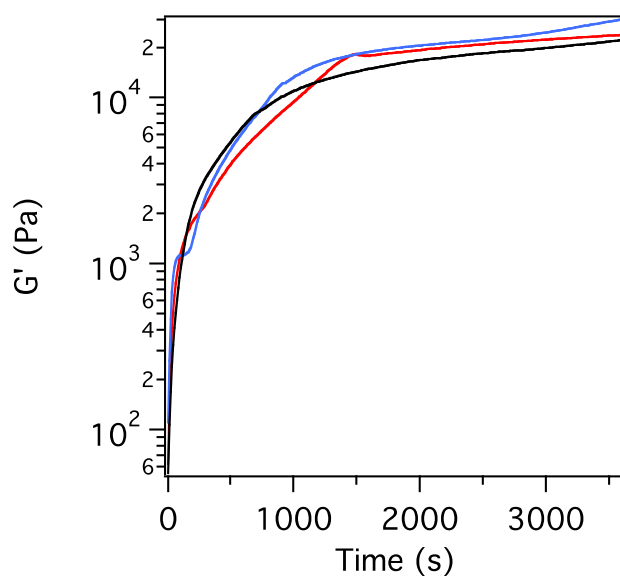

**Figure S8.** Rheology runs with FHFF-11 peptide at pH 8 without (black) and with Ca(II) (red) and Mg(II) (blue). The hydrogel samples without metal were assembled by mixing 2 wt% peptide stock in buffer (50 mM Hepes, pH 8) and running at 37°C for 1 hr. The hydrogel samples with metal ions were assembled by mixing 2 wt% peptide with 1 eq of metal in water and then the buffer (100 mM Hepes, pH 8) was added and samples analyzed by running at 37°C for 1 hr.

**Table S2.** MALDI spectra of peptides used in this work.

| Peptide name        | Peptide sequence                                  | Expected m/z | Observed m/z | MALDI spectrum |
|---------------------|---------------------------------------------------|--------------|--------------|----------------|
| FHHF-11             | Ac-FHHFRFRFHHF-CONH <sub>2</sub>                  | 1656         | 1656         | Figure S9      |
| No-Ac FHHF-11       | NH <sub>2</sub> -FHHFRFRFHHF-CONH <sub>2</sub>    | 1613         | 1613         | Figure S10     |
| COOH FHHF-11        | Ac-FHHFRFRFHHF-COOH                               | 1657         | 1657         | Figure S11     |
| FHHF-K              | Ac-FHHFKFKFHHF-CONH <sub>2</sub>                  | 1600         | 1600         | Figure S12     |
| HHF                 | Ac-HHFRFRFRFHH-CONH <sub>2</sub>                  | 1663         | 1660         | Figure S13     |
| HFH                 | Ac-HFHFRFRFHHF-CONH <sub>2</sub>                  | 1656         | 1656         | Figure S14     |
| FHFH                | Ac-FHFHFRFRFHHF-CONH <sub>2</sub>                 | 1951         | 1952         | Figure S15     |
| FHHF-GRGD           | Ac-FHHFRFRFHHFGRGD-CONH <sub>2</sub>              | 2040         | 2040         | Figure S16     |
| W substitutions     | Ac- <b>W</b> HFRFRFHHF-CONH <sub>2</sub>          | 1695         | 1695         | Figure S17     |
|                     | Ac-FHHFRFRFHH <b>W</b> -CONH <sub>2</sub>         | 1695         | 1695         | Figure S18     |
|                     | Ac-FH <b>W</b> FRFRFHHF-CONH <sub>2</sub>         | 1705         | 1705         | Figure S19     |
|                     | Ac-FHHFR <b>W</b> RFHHF-CONH <sub>2</sub>         | 1695         | 1695         | Figure S20     |
|                     | Ac-FHHFK <b>W</b> KFHHF-CONH <sub>2</sub>         | 1638         | 1638         | Figure S21     |
|                     | Ac-FHHFR <b>W</b> FHHF-CONH <sub>2</sub>          | 1686         | 1686         | Figure S22     |
|                     | Ac-FHH <b>W</b> FRFHHF-CONH <sub>2</sub>          | 1686         | 1686         | Figure S23     |
| AzAla substitutions | Ac-FHHFR ( <b>AzAla</b> ) RFHHF-CONH <sub>2</sub> | 1705         | 1705         | Figure S24     |

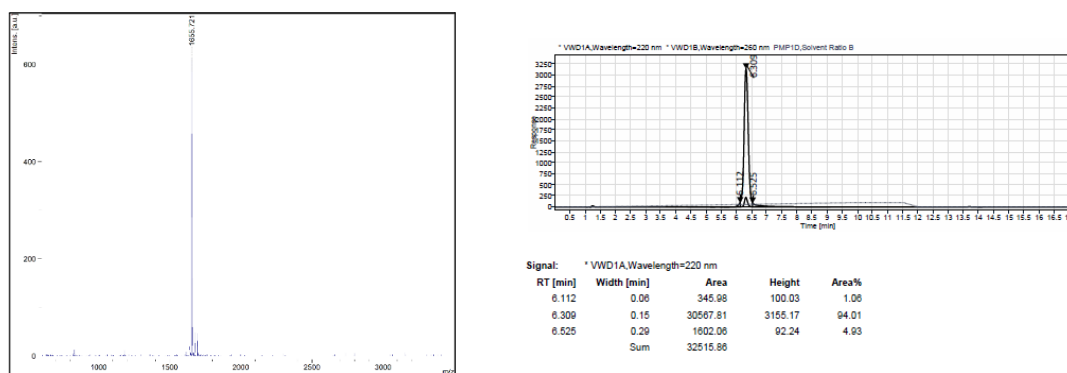

**Figure S9.** MALDI (left) and HPLC chromatogram (right) spectra of FHHF-11.

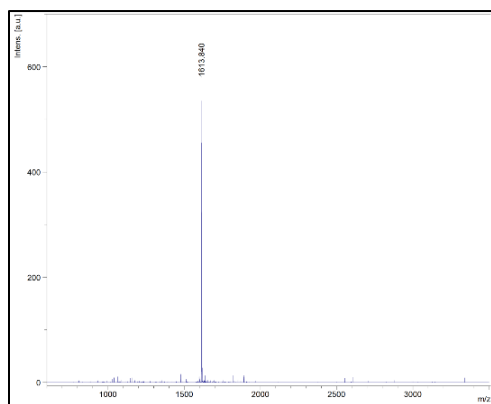

**Figure S10.** MALDI spectrum of No-Ac FHHF-11 (NH<sub>2</sub>-FHHFRFRFHHF-CONH<sub>2</sub>) peptide.

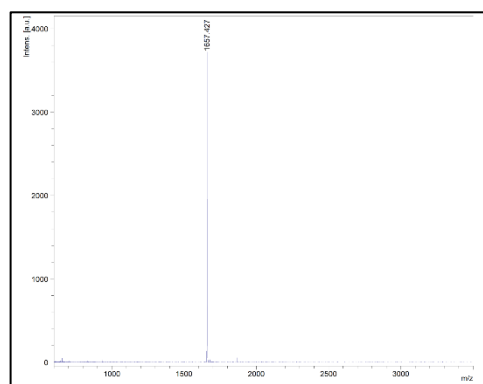

**Figure S11.** MALDI spectrum of COOH FHHF-11 (Ac-FHHFRFRFHHF-COOH) peptide.

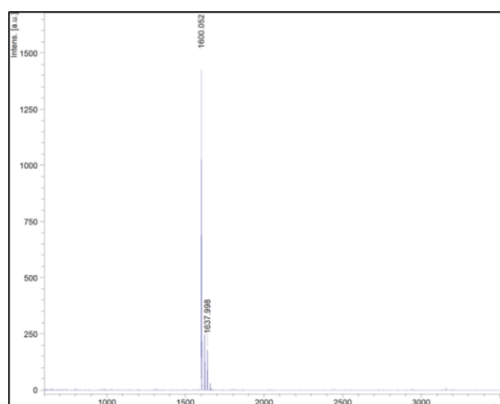

**Figure S12.** MALDI spectrum of FHHF-K (Ac-FHHFKFKFHHF-CONH<sub>2</sub>) peptide.

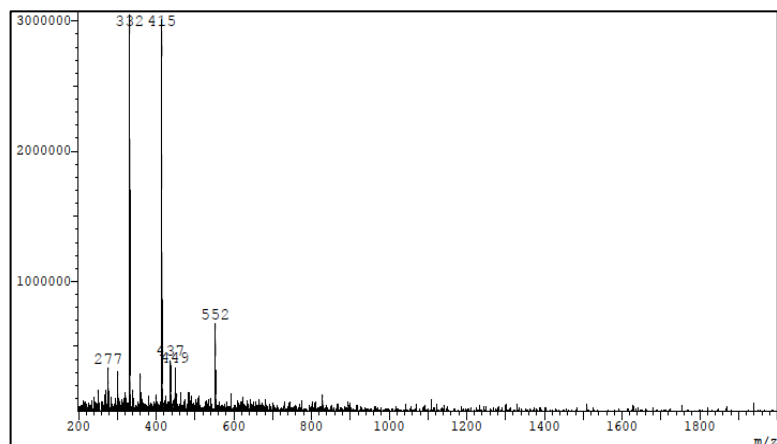

**Figure S13.** LCMS of HHF (Ac-HHFRFRFRFHH-CONH<sub>2</sub>) peptide.

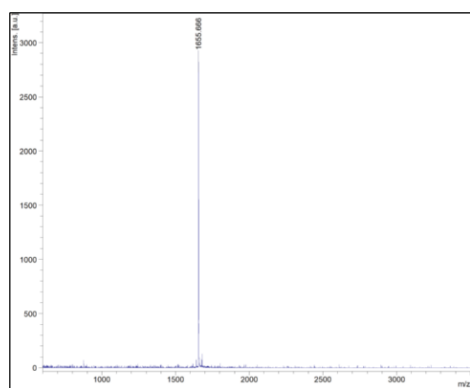

**Figure S14.** MALDI spectrum of HFH (Ac-HFHFRFRFHFH-CONH<sub>2</sub>) peptide.

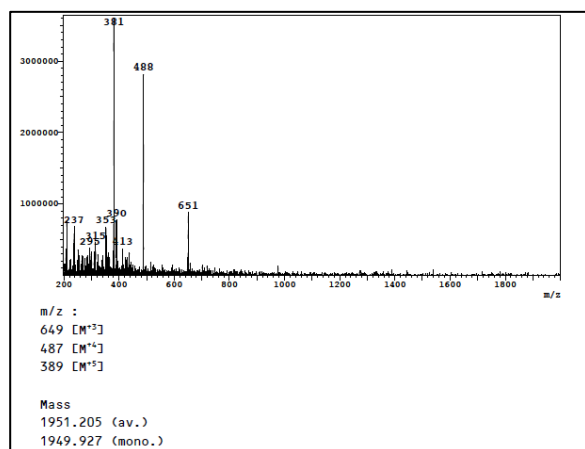

**Figure S15.** LCMS of FHFH (Ac-FHFHFRFRFHFH-CONH<sub>2</sub>) peptide.



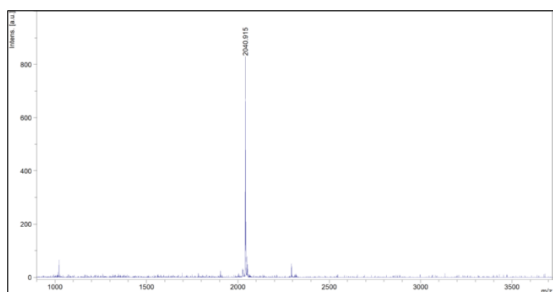

**Figure S16.** MALDI spectrum of FHHF-GRGD (Ac-FHHFRFRFHHFGRGD-CONH<sub>2</sub>) peptide.

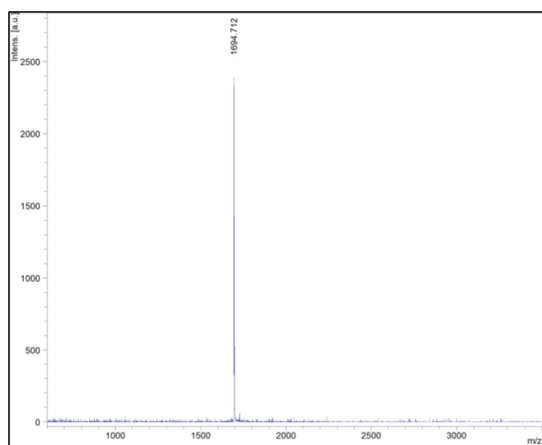

**Figure S17.** MALDI spectrum of Ac-WHHFRFRFHHF-CONH<sub>2</sub> peptide.

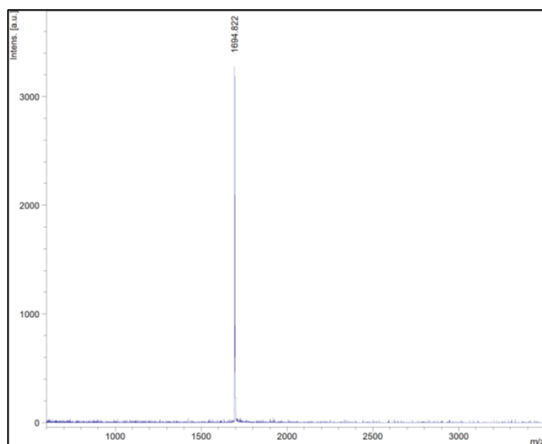

**Figure S18.** MALDI spectrum of Ac-FHHFRFRFHHW-CONH<sub>2</sub> peptide.

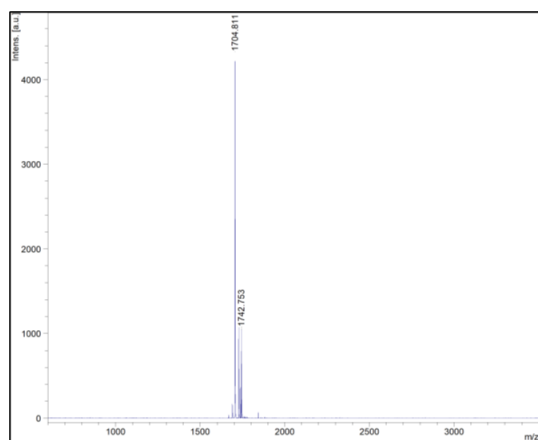

**Figure S19.** MALDI spectrum of Ac-FHWFRFRFHFF-CONH<sub>2</sub> peptide.

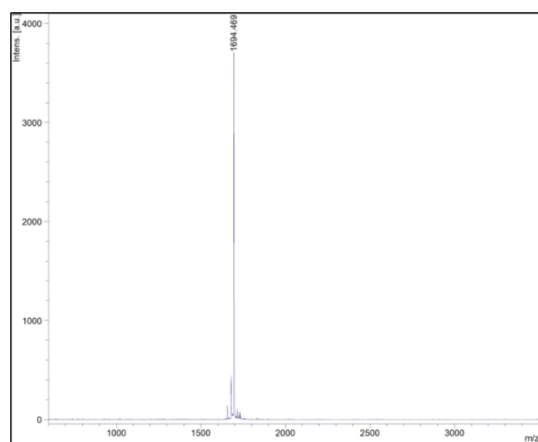

**Figure S20.** MALDI spectrum of Ac-FHHFRWRFHFF-CONH<sub>2</sub> peptide.

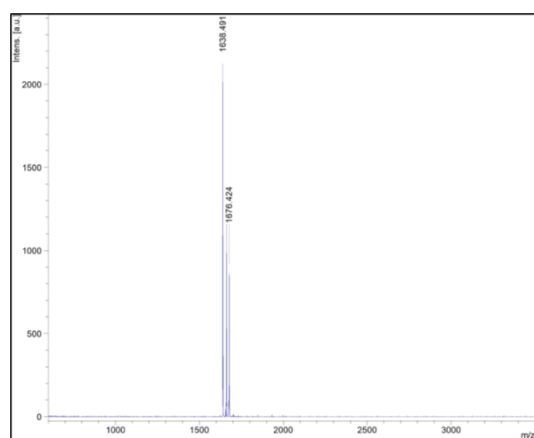

**Figure S21.** MALDI spectrum of Ac-FHHFKWKFHFF-CONH<sub>2</sub> peptide.

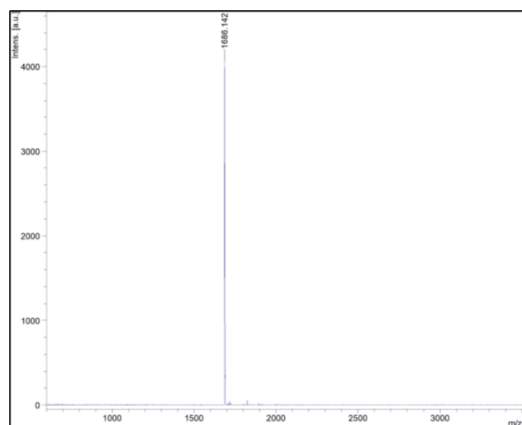

**Figure S22.** MALDI spectrum of Ac-FHHFRFWFHHF-CONH<sub>2</sub> peptide.

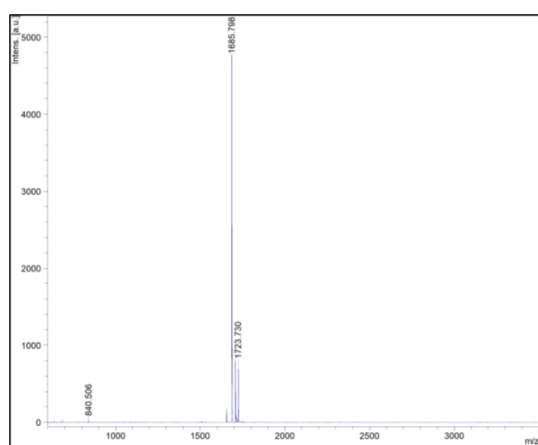

**Figure S23.** MALDI spectrum of Ac-FHHFWRFHHF-CONH<sub>2</sub> peptide.

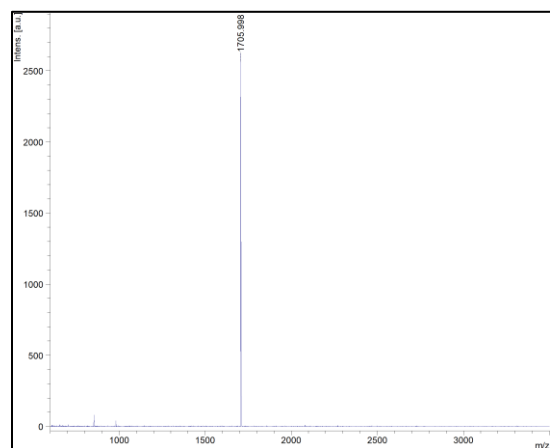

**Figure S24.** MALDI spectrum of Ac-FHHFR(AzAla)RFHHF-CONH<sub>2</sub> peptide.

## References:

1. Zhu, Y.; Wang, L.; Li, Y.; Huang, Z.; Luo, S.; He, Y.; Han, H.; Raza, F.; Wu, J.; Ge, L., Injectable pH and redox dual responsive hydrogels based on self-assembled peptides for anti-tumor drug delivery. *Biomater Sci* **2020**, *8* (19), 5415-5426.
2. Ghosh, G.; Barman, R.; Sarkar, J.; Ghosh, S., pH-Responsive Biocompatible Supramolecular Peptide Hydrogel. *The Journal of Physical Chemistry B* **2019**, *123* (27), 5909-5915.
3. Lin, B. F.; Megley, K. A.; Viswanathan, N.; Krogstad, D. V.; Drews, L. B.; Kade, M. J.; Qian, Y.; Tirrell, M. V., pH-responsive branched peptide amphiphile hydrogel designed for applications in regenerative medicine with potential as injectable tissue scaffolds. *Journal of Materials Chemistry* **2012**, *22* (37), 19447-19454.
4. Hatip Koc, M.; Cinar Ciftci, G.; Baday, S.; Castelletto, V.; Hamley, I. W.; Guler, M. O., Hierarchical Self-Assembly of Histidine-Functionalized Peptide Amphiphiles into Supramolecular Chiral Nanostructures. *Langmuir* **2017**, *33* (32), 7947-7956.
5. Raza, F.; Zhu, Y.; Chen, L.; You, X.; Zhang, J.; Khan, A.; Khan, M. W.; Hasnat, M.; Zafar, H.; Wu, J.; Ge, L., Paclitaxel-loaded pH responsive hydrogel based on self-assembled peptides for tumor targeting. *Biomaterials Science* **2019**, *7* (5), 2023-2036.
6. Kaur, H.; Sharma, P.; Patel, N.; Pal, V. K.; Roy, S., Accessing Highly Tunable Nanostructured Hydrogels in a Short Ionic Complementary Peptide Sequence via pH Trigger. *Langmuir* **2020**, *36* (41), 12107-12120.
7. Liu, Y.; Ran, Y.; Ge, Y.; Raza, F.; Li, S.; Zafar, H.; Wu, Y.; Paiva-Santos, A. C.; Yu, C.; Sun, M.; Zhu, Y.; Li, F., pH-Sensitive Peptide Hydrogels as a Combination Drug Delivery System for Cancer Treatment. *Pharmaceutics* **2022**, *14* (3).
8. Yamamoto, S.; Nishimura, K.; Morita, K.; Kanemitsu, S.; Nishida, Y.; Morimoto, T.; Aoi, T.; Tamura, A.; Maruyama, T., Microenvironment pH-Induced Selective Cell Death for Potential Cancer Therapy Using Nanofibrous Self-Assembly of a Peptide Amphiphile. *Biomacromolecules* **2021**, *22* (6), 2524-2531.
9. Schneider, J. P.; Pochan, D. J.; Ozbas, B.; Rajagopal, K.; Pakstis, L.; Kretsinger, J., Responsive Hydrogels from the Intramolecular Folding and Self-Assembly of a Designed Peptide. *Journal of the American Chemical Society* **2002**, *124* (50), 15030-15037.
10. Dexter, A. F.; Fletcher, N. L.; Creasey, R. G.; Filardo, F.; Boehm, M. W.; Jack, K. S., Fabrication and characterization of hydrogels formed from designer coiled-coil fibril-forming peptides. *RSC Advances* **2017**, *7* (44), 27260-27271.
11. Liu, Y.; Yang, Y.; Wang, C.; Zhao, X., Stimuli-responsive self-assembling peptides made from antibacterial peptides. *Nanoscale* **2013**, *5* (14), 6413-21.
12. Bortolini, C.; Liu, L.; Hoffmann, S. V.; Jones, N. C.; Knowles, T. P. J.; Dong, M., Exciton Coupling of Phenylalanine Reveals Conformational Changes of Cationic Peptides. *ChemistrySelect* **2017**, *2* (8), 2476-2479.
13. Decandio, C. C.; Silva, E. R.; Hamley, I. W.; Castelletto, V.; Liberato, M. S.; Oliveira, V. X.; Oliveira, C. L. P.; Alves, W. A., Self-Assembly of a Designed Alternating Arginine/Phenylalanine Oligopeptide. *Langmuir* **2015**, *31* (15), 4513-4523.
14. Perween, S.; Chandanshive, B.; Kotamarthi, H. C.; Khushalani, D., Single amino acid based self-assembled structure. *Soft Matter* **2013**, *9* (42), 10141-10145.

15. Krysmann, M. J.; Castelletto, V.; Kellarakis, A.; Hamley, I. W.; Hule, R. A.; Pochan, D. J., Self-Assembly and Hydrogelation of an Amyloid Peptide Fragment. *Biochemistry* **2008**, 47 (16), 4597-4605.
